# Supplementary material
Source: publisher figshare collection journal article supplement (https://acs.figshare.com/ndownloader/files/3765727)
Supplement: Supplementary file 1 [file 3765727]

# Supporting Information

## **Fast Nanorod Diffusion through Entangled Polymer Melts**

*Jihoon Choi<sup>1</sup>, Matteo Cargnello<sup>2</sup>, Christopher B. Murray<sup>2, 4</sup>, Nigel Clarke<sup>3</sup>, Karen I. Winey<sup>4</sup>, and  
Russell J. Composto<sup>4\*</sup>*

<sup>1</sup> Department of Materials Science and Engineering, Chungnam National University Daejeon,  
South Korea

<sup>2</sup> Department of Chemistry, University of Pennsylvania, Philadelphia, United States

<sup>3</sup> Department of Physics and Astronomy, University of Sheffield, Sheffield, United Kingdom

<sup>4</sup> Department of Materials Science and Engineering, University of Pennsylvania, Philadelphia,  
United States

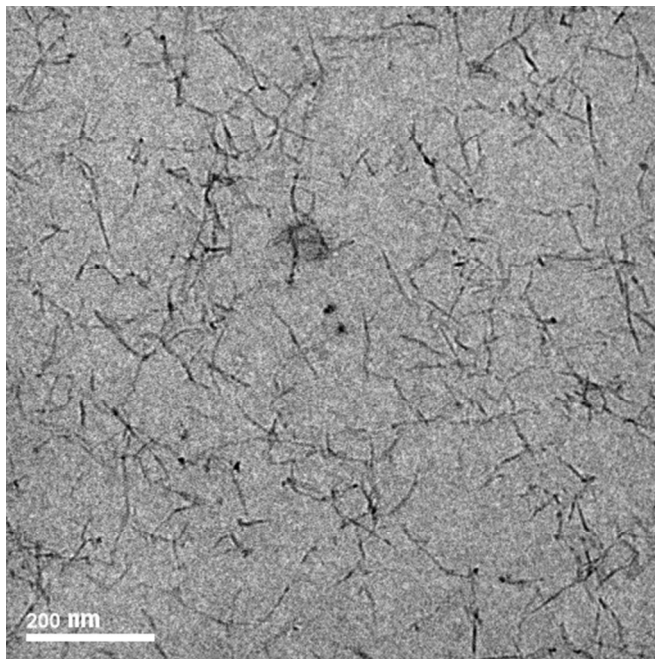

**Figure S1.** Transmission electron micrograph depicting the stable dispersion of TiO<sub>2</sub> NRs in PS matrix ( $M = 650$  kDa,  $\phi_{\text{NR}} = 0.01$ ) after thermal annealing at  $190^{\circ}\text{C}$  for 6hrs.
